# Supplementary material for: Independent attenuation correction of whole body [18F]FDG-PET using a deep learning approach with Generative Adversarial Networks
Source: Springer Nature journal article supplement (doi:10.1186/s13550-020-00644-y), 2020-05-24

# Appendix: $CT_{GAN}$ compared to CT, data sets 1-6

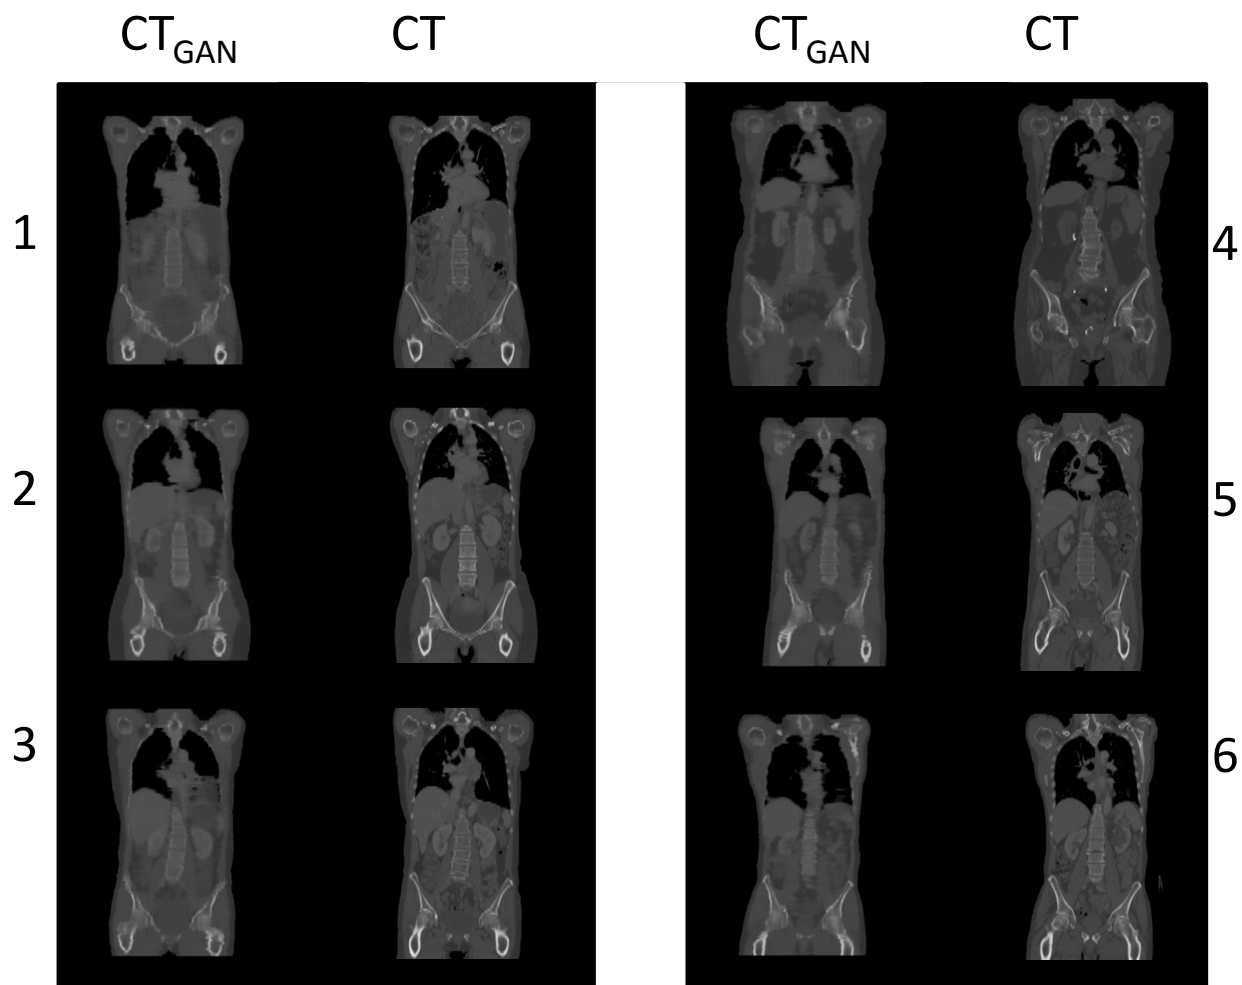

# Appendix: CT<sub>GAN</sub> compared to CT, data sets 13-18

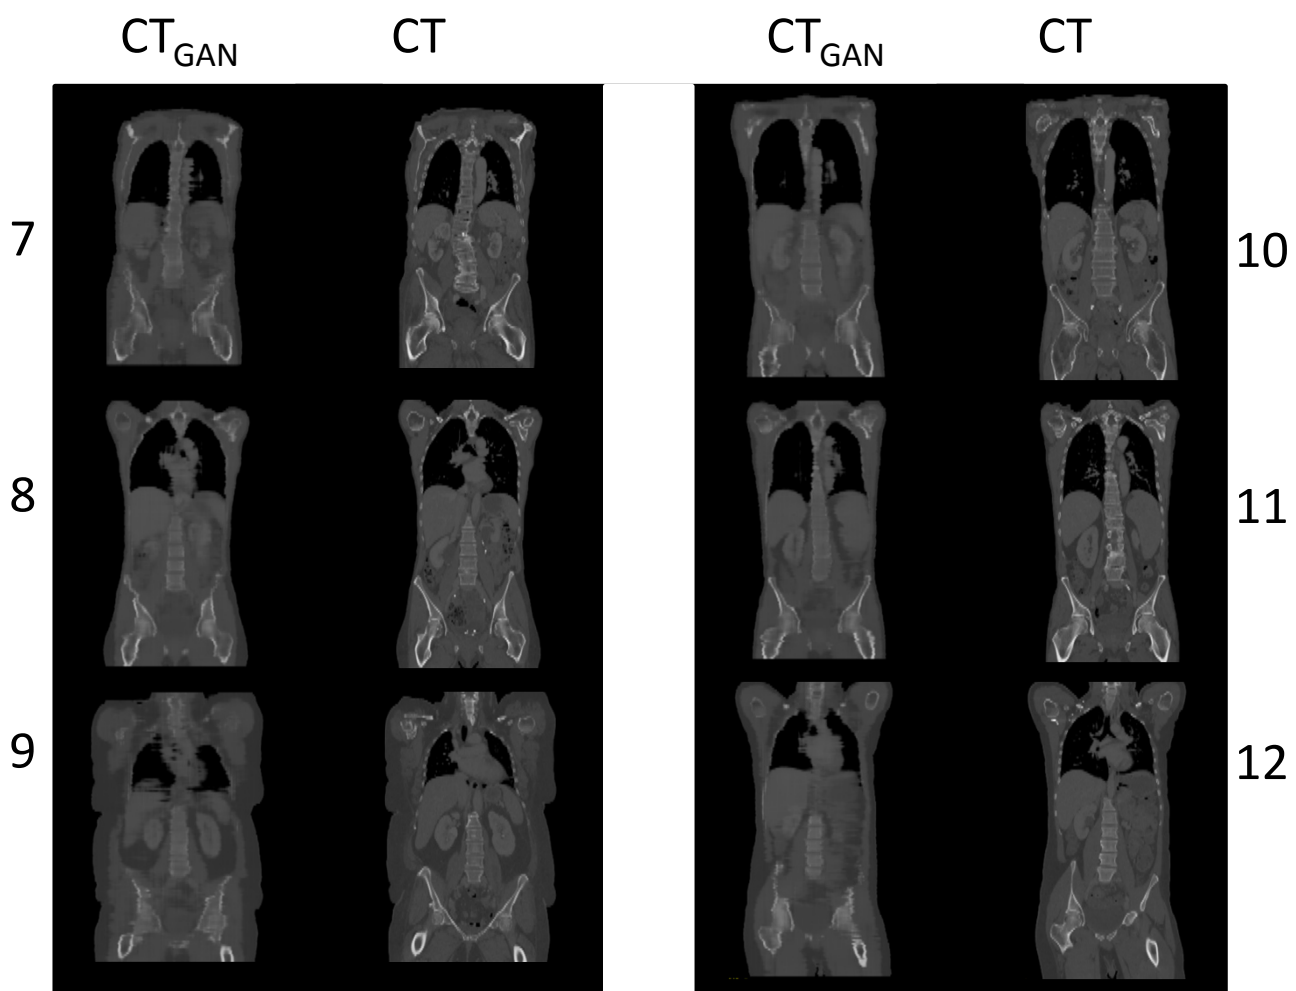

Appendix:  $CT_{GAN}$  compared to CT, data sets 13-18

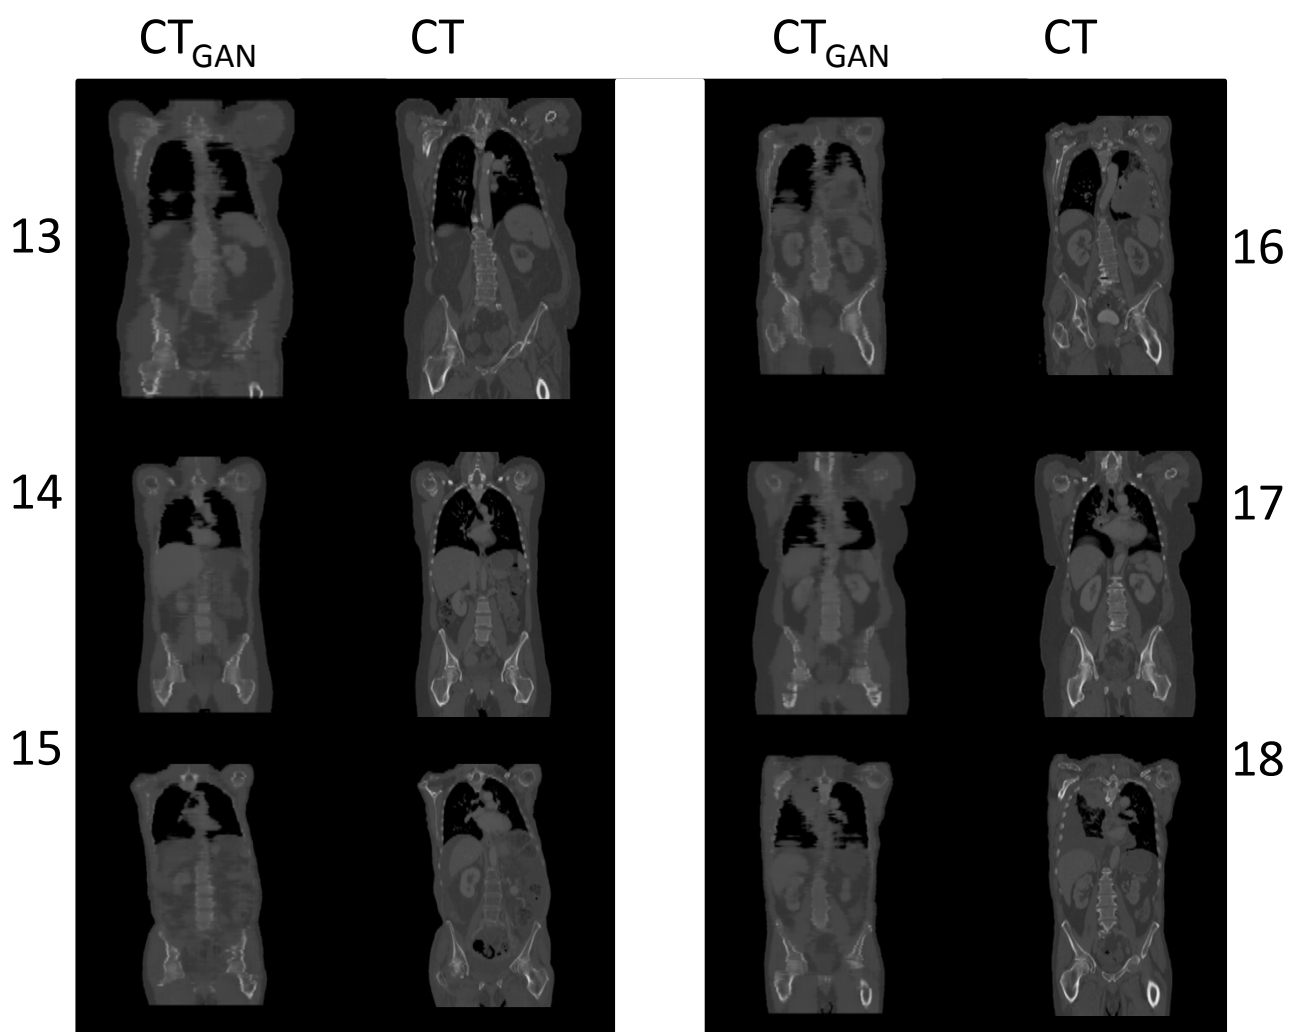

Appendix: CT<sub>GAN</sub> compared to CT, data sets 19-24

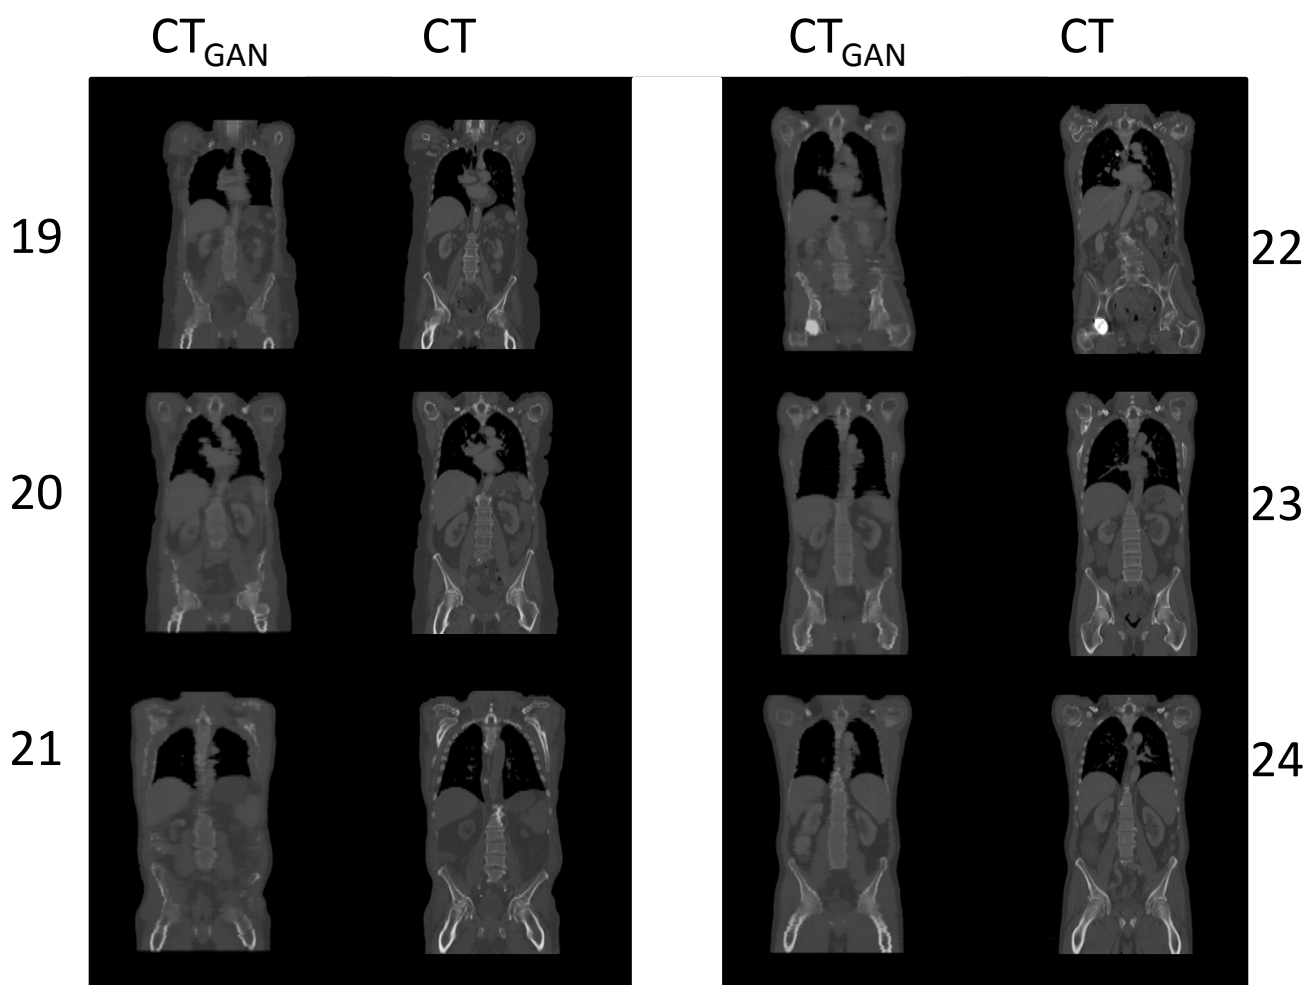

Supplement: MOESM1 [file 18009416]
